# Supplementary material for: Major Neutrophil-Derived Soluble Mediators Associate With Baseline Lung Pathology and Post-Treatment Recovery in Tuberculosis Patients
Source: PubMed Central journal article supplement (PMC8650718; doi:10.3389/fimmu.2021.740933), 2021-11-23
Supplement: DataSheet_1.pdf [file DataSheet_1.pdf]

## Supplementary Figures

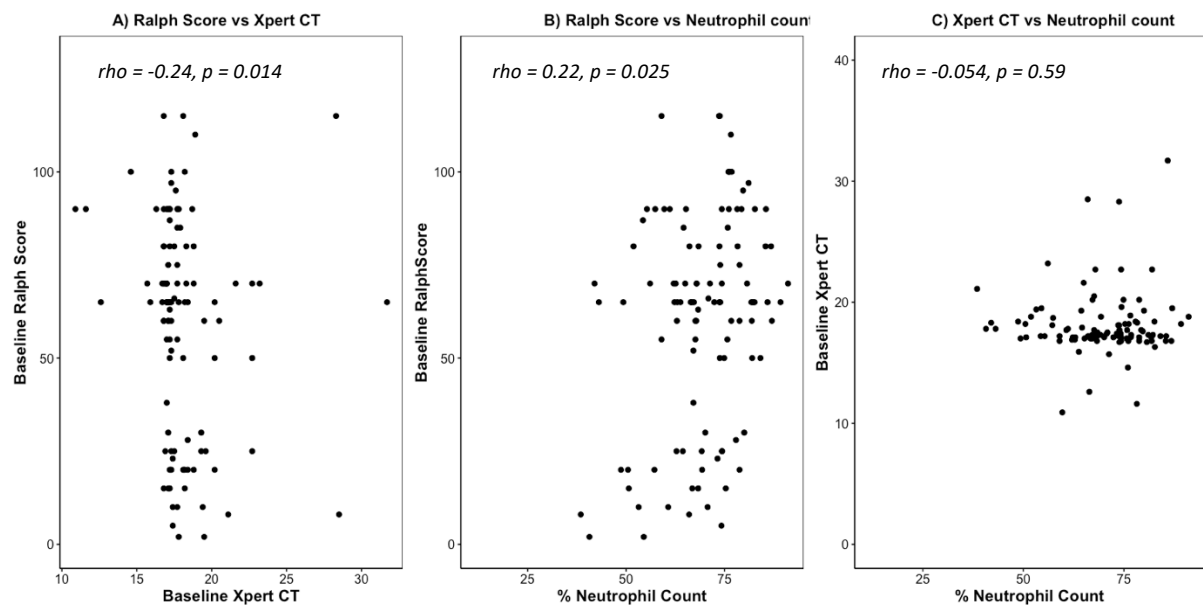

**Supplementary Fig. 1: Spearman correlation curves between.** A) baseline Ralph score and Xpert Ct values B) baseline Ralph score and neutrophil counts and C) baseline Xpert Ct values and neutrophil counts. Correlations were performed using Spearman rank-order correlation coefficient.

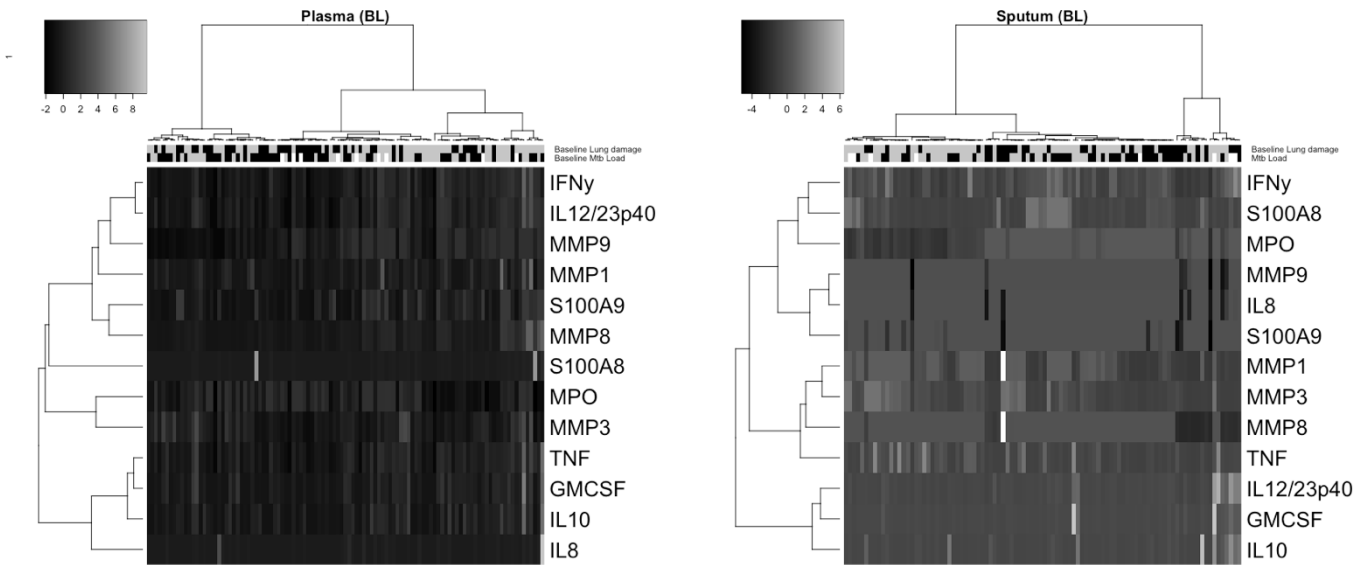

**Supplementary Fig. 2: Inflammatory mediator level heatmap representing baseline inflammatory mediator concentrations for ATB patients.** Showing severe lung damage and high Mtb load (grey) or mild lung damage and low Mtb load (black), respectively in: A) plasma and B) sputum. White represents patients that could not be classified into either good or poor recovery groups due to missing month 6 CXR scores (NA). A non-supervised two-way hierarchical cluster analysis (Ward's minimum variance method) was employed to grade TB disease severity, using the Ralph score and Xpert Ct values.
