# Supplementary material for: Major Neutrophil-Derived Soluble Mediators Associate With Baseline Lung Pathology and Post-Treatment Recovery in Tuberculosis Patients
Source: Front Immunol. 2021 Nov 23;12:740933. doi: 10.3389/fimmu.2021.740933 (PMC8650718; doi:10.3389/fimmu.2021.740933)
Supplement: Supplementary file 2 [file Table_1.xlsx]

## Sheet: Supplementary table 1 
Supplementary table 1: Differences in plasma and sputum inflammatory mediator concentrations between males and females
	Plasma			Sputum
	p-value	Concentration (pg/ml) median[IQR]/ Males	Concentration (pg/ml) median[IQR]/ Females	p-value	Concentration (pg/ml) median[IQR]/ Males	Concentration (pg/ml) median[IQR]/ Females
MMP1	ns	2477[1461-4468]	1957[1160-3395]	0.0247	14992[2554-19900]	3594[1541-17813]
MMP3	0.0003	11225[8265-16204]	6624[4275-9676]	ns	7965[2806-20134]	3806[1909-9724]
MMP8	ns	11707[6770-22474]	7044[3336-16264]	ns	117180[117180-117180]	117180[42066-117180]
MMP9	ns	36305[16019-62360]	32658[20688-62360]	ns	62360[62360-62360]	62360[62360-62360]
MPO	ns	36464[20219-52031]	38538[24739-53781]	0.0185	42239[17865-54920]	54920[47491-54920]
S100A8	ns	138[99.4-223]	106[73.5-147]	ns	3850[1178-13397]	4320[2557-12624]
S100A9	ns	3675[1790-8332]	3633[1535-6916]	ns	13060[13060-13060]	13060[13060-13060]
IL8	0.037	15.8[8.92-28.2]	11.7[6.05-16.6]	ns	1440[1440-1440]	1440[1440-1440]
IL10	0.0403	5.27[2.94-7.82]	2.93[1.85-5.65]	ns	14.4[7.05-43.1]	16[8.49-40.3]
IL12/23(p40)	0.033	2039[1211-2788]	1540[749-2045]	ns	5692[4172-9001]	6167[4730-13095]
GM-CSF	0.0264	14.9[7.80-22.8]	7.76[5.76-17.4]	ns	99.9[51.2-165]	93.6[51.5-284]
TNF	0.0336	43.3[29.3-53.1]	33.8[21.3-38.9]	ns	445[165-992]	447[110-1369]
IFNg	ns	540[359-730]	417[319-538]	ns	1795[1225-2572]	1631[1149-2458]
Wilcoxon rank sum test with continuity correction was used to analyse differences between medians; ns = not significant; IQR = interquartile range; pg/ml = picograms per ml
# = Higher in females; ns = not significant

## Sheet: Supplementary table 2
Supplementary table 2: Differences in inflammatory mediator concentrations from plasma, sputum and whole blood-stimulated supernatants over time
	Plasma			Sputum			EC			PPD			WCL			PMA
	median [IQR]	Month 2 vs. BL	Month 6 vs. BL	median [IQR]	Month 2 vs. BL	Month 6 vs. BL	median [IQR]	Month 2 vs. BL	Month 6 vs. BL	median [IQR]	Month 2 vs. BL	Month 6 vs. BL	median [IQR]	Month 2 vs. BL	Month 6 vs. BL	median [IQR]	Month 2 vs. BL	Month 6 vs. BL
MMP1	1646 [776 - 3314]	2.3e-05	4.9e-12	5397 [891 - 19900]	1.8e-05	2.2e-07	3121 [1684 - 5888]	ns	ns	6762 [3685 - 16320]	ns	ns	11124 [5289 - 19900]	ns	ns	15634 [6823 - 19900]	ns	0.0035
MMP3	9348 [5954 - 13813]	ns	ns	3650 [1188 - 13711]	5.4e-06	3.5e-07	11796 [7693 - 15993]	ns	ns	11283 [7574 - 16091]	ns	ns	11528 [7756 - 17336]	ns	ns	11078 [7870 - 15427]	ns	ns
MMP8	4367 [1991 - 10045]	2.2e-07	3.4e-14	117180 [34669 - 117180]	2.8e-05	1.3e-05	29501 [15690 - 58902]	ns	ns	51616 [30043 - 88388]	ns	ns	53196 [36495 - 75158]	0.0002	ns	86802 [53041 - 117180]	ns	0.015
MMP9	18550 [8302 - 39725]	0.025	0.00016	62360 [62360 - 62360]	0.016	0.0015	57394 [31600 - 62360]	ns	ns	62360 [62360 - 62360]	0.0180+	1.90E-08+	62360 [62360 - 62360]	0.021	0.0360+	62360 [62360 - 62360]	ns	5.40E-07+
MPO	31886 [21233 - 48458]	ns	ns	54920 [26570 - 54920]	ns	ns	34616 [20002 - 54920]	ns	ns	32410 [17716 - 54920]	ns	ns	23408 [10814 - 53022]	ns	0.0091+	28300 [12488 - 48493]	ns	ns
S1000A8	97.2 [48.3 - 182]	3.5e-07	9.9e-10	4134 [1536 - 13658]	ns	ns	288 [191 - 387]	ns	ns	654 [483 - 882]	ns	ns	627 [513 - 786]	ns	0.0280+	1195 [971 - 1566]	ns	ns
S100A9	1840 [680 - 4925]	0.00027	2e-16	13060 [13060 - 13060]	ns	ns	3901 [1750 - 7767]	ns	ns	6912 [3067 - 13060]	ns	ns	4637 [2890 - 8529]	ns	ns	13060 [13060 - 13060]	0.0018+	4.90E-16+
IL8	12.9 [7.24 - 24.6]	ns	ns	1440 [1440 - 1440]	ns	ns	1440 [1440 -1440]	ns	ns	1440 [1440 - 1440]	ns	ns	1440 [1440 - 1440]	ns	ns	1440 [1440 -1440]	ns	ns
IL10	3.68 [1.85 - 6.63]	0.00013	3.8e-06	11.6 [3.83 - 32.4]	0.0014	ns	24.5 [12.8 - 91.2]	ns	ns	189 [492 - 1800]	ns	ns	749 [440 - 1250]	ns	ns	665 [356 - 1251]	ns	0.0036+
IL12/23(p40)	1278 [793 - 2071]	0.00098	4e-06	5755 [3658 - 8255]	0.025	ns	2919 [1988 - 3774]	ns	ns	3929 [3081 - 5035]	0.0313+	0.0095+	3983 [3049 - 4881]	ns	ns	4710 [3757 - 5491]	ns	0.0044+
GM-CSF	7.46 [5.76 - 14.4]	2.1e-06	1.9e-05	53.2 [31.9 - 171]	5.4e-07	5.50E-03+	30.2 [19.0 - 42.2]	ns	0.0270+	60.3 [38.4 - 110]	1.00E-09+	1.50E-09+	88.7 [59.0 - 140]	0.00002+	2.80E-05+	5600 [4393 - 5600]	4.30E-06+	6.70E-11+
TNF	29.9 [21.3 - 42.4]	0.00069	1.3e-05	267 [87.6 - 863]	0.00017	2.10E-05+	359 [143 - 896]	ns	0.0280+	4100 [1995 - 4100]	ns	0.0020+	3474 [2158 - 4100]	ns	0.0002+	4100 [4100 - 4100]	ns	0.0200+
IFNg	341 [238 - 519]	3e-06	1.3e-07	1522 [1034 - 2320]	0.0095	ns	1122 [794 - 1680]	ns	ns	1818 [1353 - 3417]	2.6E-07+	3.2E-08+	2173 [1619 - 3604]	ns	0.0063+	20580 [20580 - 20580]	0.0003+	1.00E-11+
ns = not significant; BL = baseline
+: Median concentration at given time point is above median concentration at baseline

## Sheet: Supplementary table 3
Supplementary table 3: Differences (p-value) in plasma and sputum concentrations of inflammatory mediators at follow up time points compared with baseline within lung damage groups.
	Plasma						Sputum
	Mild			Severe			Mild			Severe
	median [IQR]	Month 2 vs. BL	Month 6 vs. BL	median [IQR]	Month 2 vs. BL	Month 6 vs. BL	median [IQR]	Month 2 vs. BL	Month 6 vs. BL	median [IQR]	Month 2 vs. BL	Month 6 vs. BL
MMP1	1643 [822 - 2882]	0.0235	0.00678	1646 [774 - 3777]	0.00529	1.11e-10	2562 [813 - 14197]	0.00784	ns	7367 [959 - 19900]	0.00488	1.9e-05
MMP3	8202 [4883 - 13046]	ns	ns	9775 [6784 - 14537]	ns	ns	3018 [1227 - 9685]	0.00397	0.0335	4676 [1149 - 15253]	0.0086	9.5e-05
MMP8	3997 [1730 - 8894]	0.00957	0.0012	4576 [2131 - 11296]	0.000199	3.3e-12	117180 [17355-117180]	ns	ns	117180 [48624 - 117180]	0.00187	4.99e-05
MMP9	20493 [8370 - 34167]	ns	ns	17848 [8302 - 44839]	ns	0.0126	62360 [62360 - 62360]	ns	ns	62360 [62360 - 62360]	ns	ns
MPO	37191 [25115 - 51758]	ns	ns	28873 [20064 - 45485]	ns	ns	54920 [54920 - 54920]	ns	ns	54920 [20667 - 54920]	ns	ns
S1000A8	101 [53.0 - 182]	ns	ns	96.8 [45.8 - 181]	1.14e-05	4.61e-09	4359 [1772 - 12485]	ns	ns	4058 [1142 - 16322]	ns	ns
S100A9	2304 [797 - 5300]	0.0962	2.39e-07	1682 [666 - 4609]	0.00782	3.13e-11	13060 [13060 - 13060]	ns	ns	13060 [13060 - 13060]	ns	ns
IL8	12.2 [7.14 - 22.8]	ns	ns	13.7 [7.33 - 25.8]	ns	ns	1440 [1440 - 1440]	ns	ns	1440 [1440 - 1440]	ns	ns
IL10	3.72 [1.85 - 6.58]	ns	ns	3.46 [1.85 - 6.83]	0.00113	0.000386	14.9 [7.05 - 39.1]	ns	ns	11.0 [3.44 - 27.1]	0.0142	ns
IL12/23(p40)	1092 [532 - 1751]	ns	0.03	1480 [911 - 2180]	0.0127	3.41e-05	6157 [3660 - 10299]	ns	ns	5216 [3663 - 7853]	ns	ns
GM-CSF	7.01 [5.76 - 15.4]	ns	ns	7.68 [5.76 - 13.9]	8.08e-05	4.54e-05	70.0 [37.2 - 127]	0.04	ns	51.5 [30.4 - 112]	0.000103	ns
TNF	28.0 [19.2 - 38.2]	ns	ns	31.2 [23.6 - 44.7]	0.00112	3.77e-06	196 [89.9 - 411]	ns	ns	314 [87.0 -1046]	0.0168	0.00131
IFNg	319 [205 - 460]	0.042	ns	346 [268 - 547]	0.00041	3.84e-07	1443 [1042 - 1987]	ns	ns	1557 [1025 - 2421]	0.0394	ns
ns = not significant; BL = baseline

## Sheet: Supplementary table 4
Supplementary table 4: Differences (p-value) in plasma and sputum concentrations of inflammatory mediators at follow up time points compared with baseline within Mtb load groups.
	Plasma						Sputum
	Low			High			Low			High
	median [IQR]	Month 2 vs. BL	Month 6 vs. BL	median [IQR]	Month 2 vs. BL	Month 6 vs. BL	median [IQR]	Month 2 vs. BL	Month 6 vs. BL	median [IQR]	Month 2 vs. BL	Month 6 vs. BL
MMP1	1473 [704 - 2844]	0.0294	2.36e-05	1913 [975 - 3738]	0.0138	2.62e-06	2205 [879 - 19900]	0.023	0.00066	7523 [947 - 19900]	0.0261	0.00224
MMP3	9213 [5050 - 13373]	ns	ns	9084 [6512 - 13218]	ns	ns	3372 [1077 - 8523]	0.0135	6.67e-05	4594 [1319 - 16224]	0.0104	0.0045
MMP8	3306 [1593 - 9069]	0.00183	4.16e-06	5101 [2521 - 10355]	0.00768	1.57e-07	117180 [20780 - 117180]	0.00312	0.0191	117180 [59296 - 117180]	ns	0.00706
MMP9	17867 [6973 - 35207]	ns	0.0347	18635 [10339 - 46761]	ns	ns	62360 [62360 - 62360]	ns	0.00328	62360 [62360 - 62360]	ns	ns
MPO	34380 [2129 - 51055]	ns	ns	28461 [20697 - 43753]	ns	ns	54920 [38878 - 54920]	ns	ns	54920 [18955 - 54920]	ns	ns
S1000A8	101 [50.0 - 195]	0.00162	0.00037	90.3 [40.1 - 160]	0.00494	8.71e-05	5256 [1745 - 16608]	ns	ns	2710 [1130 - 9799]	ns	ns
S100A9	1719 [675 - 4392]	0.02	5.4e-10	2159 [ 896 - 5307]	0.0272	1.64e-08	13060 [13060 - 13060]	ns	ns	13060 [13060 - 13060]	ns	ns
IL8	11.7 [6.03 - 21.7]	ns	ns	16.1 [8.16 - 27.6]	ns	ns	1440 [1440 - 1440]	ns	ns	1440 [1440 - 1440]	ns	ns
IL10	3.70 [1.85 - 6.57]	ns	0.0029	3.18 [1.85 - 6.97]	0.0485	0.0485	13.0 [5.83 - 28.5]	ns	ns	10.5 [3.47 - 29.0]	ns	ns
IL12/23(p40)	1172 [701 - 2058]	ns	0.00125	1258 [792 - 2102]	ns	0.024	5446 [3224 - 8576]	ns	ns	5301 [3706 - 7962]	ns	ns
GM-CSF	6.20 [5.76 - 14.7]	0.00284	0.00989	7.72 [5.76 -13.2]	0.00954	0.0161	51.6 [31.6 - 103]	0.00287	ns	61.7 [32.0 - 123]	0.0411	ns
TNF	29.4 [21.1 - 44.3]	ns	0.0104	29.4 [21.1 - 41.5]	ns	0.0132	214 [85.8 - 543]	ns	0.0226	326 [107 - 1319]	ns	0.00928
IFNg	339 [233 - 531]	0.000921	0.000835	337 [245 - 490]	ns	0.00185	1568 [1078 - 2311]	ns	ns	1518 [979 - 2117]	ns	ns
ns = not significant; BL = baseline

## Sheet: Supplementary table 5
Supplementary table 5: Unadjusted and adjusted logistic regression models for the effect of plasma inflammatory mediator levels on severity of ATB-related lung pathology at baseline.
	Unadjusted									*Adjusted
	Severity			Mtb load			Recovery			Severity			Mtb load			Recovery
	OR	95% CI	p-value	OR	95% CI	p-value	OR	95% CI	p-value	OR	95% CI	p-value	OR	95% CI	p-value	OR	95% CI	p-value
Neutrophil Count	1.02442	0.988711980, 1.062934464	ns	1.01391	0.97833973, 1.052137966	ns	1.03524	0.98240517, 1.096908826	ns	1.01636	0.97867652, 1.056284621	ns	1.00596	0.96741057, 1.046505284	ns	1.03669	0.98265877, 1.099959295	ns
MMP1	1.00026	1.000086236, 1.000482566	0.01	1.00009	0.99997624, 1.000229627	ns	1.00002	0.99988635, 1.000154198	ns	1.00026	1.000081075, 1.000480891	0.014	1.00009	0.99997029, 1.000225157	ns	1.00002	0.99988628, 1.000154214	ns
MMP3	1.00002	0.99997036, 1.000063164	ns	1.00002	0.99997463, 1.000066871	ns	1.00002	0.99995117, 1.000089204	ns	0.999996	0.9999475, 1.000045202	ns	1	0.99995267, 1.000049919	ns	1.00002	0.99995058, 1.000093388	ns
MMP8	1.00006	1.000025725, 1.000104597	0.003	1.00001	0.99998888, 1.000023895	ns	1.00003	1.00000446, 1.00005678	0.041	1.00006	1.000025644, 1.000105416	0.003	1	0.99998606, 1.00002215	ns	1.00003	1.000004615, 1.000057111	0.039
MMP9	1.00001	0.99999098, 1.000027382	ns	1	0.99998346, 1.000020936	ns	1.00001	0.99998829, 1.000037649	ns	1.00001	0.99999112, 1.000029034	ns	1	0.99998353, 1.000022588	ns	1.00001	0.9999883, 1.000037657	ns
MPO	0.999982	0.99995736, 1.000005749	ns	0.999983	0.99995777, 1.00000737	ns	0.999996	0.9999644, 1.000027894	ns	0.999982	0.99995641, 1.000006968	ns	0.999983	0.9999571, 1.000008808	ns	0.999996	0.99996419, 1.000027938	ns
S1000A8	1.00637	1.002104265, 1.011462541	0.007	0.999181	0.99603912, 1.000099241	ns	1.0001	0.99967495, 1.000591106	ns	1.00581	1.00132268, 1.011017826	0.018	0.998559	0.99509134, 1.000042226	ns	1.0001	0.99967179, 1.000597435	ns
S100A9	1.00008	0.99999294, 1.000183025	ns	1.00011	1.000009571, 1.000210796	0.035	1.00011	0.99998602, 1.000241658	ns	1.00008	0.9999836, 1.000181315	ns	1.00011	1.000004415, 1.000215335	0.046	1.00011	0.99998608, 1.00024243	ns
IL8	1.03087	1.007202573, 1.061664382	0.022	0.997065	0.98506191, 1.001040539	ns	1.0015	0.99858283, 1.007636473	ns	1.02595	1.00386188, 1.057078676	ns	0.995174	0.98055746, 1.000500437	ns	1.00152	0.99858781, 1.007693263	ns
IL10	1.01282	0.930921834, 1.1093	ns	1.01009	0.926436019, 1.102017092	ns	1.04469	0.92642555, 1.198840423	ns	0.991185	0.907561478, 1.087115046	ns	0.988333	0.902070258, 1.080664448	ns	1.04488	0.926483657, 1.199297364	ns
IL12/23(p40)	1.00064	1.000238574, 1.001085353	0.003	1.0001	0.99973977, 1.000462103	ns	1.0003	0.99979774, 1.000847335	ns	1.00057	1.00015461, 1.001023347	0.01	0.999989	0.99960815, 1.000369638	ns	1.00031	0.99980092, 1.000868525	ns
GM-CSF	1.0167	0.9899907, 1.050482431	ns	1.00366	0.97782857, 1.030704451	ns	1.02229	0.98227357, 1.072961678	ns	1.00994	0.98304182, 1.043506907	ns	0.997046	0.97012864, 1.02428829	ns	1.02322	0.9824779, 1.075151049	ns
TNF	1.02156	1.001584161, 1.04556732	ns	0.996764	0.97836098, 1.014462097	ns	1.01146	0.98657484, 1.04124242	ns	1.0168	0.99654256, 1.041036257	ns	0.990502	0.97045277, 1.008953162	ns	1.01222	0.98664046, 1.043290331	ns
IFNg	1.00219	1.000656662, 1.003936886	0.009	1.0001	0.99873186, 1.001473045	ns	1.00079	0.99883168, 1.002881304	ns	1.00198	1.000409836, 1.003741961	0.019	0.999788	0.99833147, 1.001215111	ns	1.00083	0.99883279, 1.002965471	ns
*Adjusted for sex
NB: Each lung pathology factor was examined separately; no two factors were entered at once
ns = not significant; CI = Confidence interval; OR = odds ratio

## Sheet: Supplementary table 6
Supplementary table 6: Unadjusted and adjusted logistic regression models for the effect of sputum inflammatory mediator levels on severity of ATB-related lung pathology at baseline.
	Unadjusted									*Adjusted
	Severity			Mtb load			Recovery			Severity			Mtb load			Recovery
	OR	95% CI	p-value	OR	95% CI	p-value	OR	95% CI	p-value	OR	95% CI	p-value	OR	95% CI	p-value	OR	95% CI	p-value
MMP1	1.00005	1.00000046, 1.000104893	ns	1.00004	0.99998911, 1.00009304	ns	0.999996	0.99992774, 1.00006476	ns	1.00004	0.99998365, 1.00009342	ns	1.00003	0.9999741, 1.00008297	ns	0.999996	0.99992471, 1.00006695	ns
MMP3	0.999987	0.99995343, 1.000021455	ns	1.00003	0.99999418, 1.00007065	ns	1	0.99995484, 1.00005012	ns	0.999974	0.99993724, 1.00001069	ns	1.00003	0.9999870,1.00006609	ns	1	0.99995347, 1.00005179	ns
MMP8	1.00001	1.00000121, 1.00002335	0.032	1	0.99999145, 1.00001427	ns	0.999998	0.99998128, 1.00001533	ns	1.00001	0.99999902, 1.00002216	ns	1	0.9999887 1.00001287	ns	0.999998	0.99998126, 1.00001533	ns
MMP9	0.999989	0.99994018, 1.00002589	ns	0.999985	0.99994264, 1.0000213	ns	1.00001	0.99996488, 1.0000596	ns	0.999986	0.99993438, 1.00002518	ns	0.999983	0.9999369, 1.00002051	ns	1.00001	0.99996467, 1.00005988	ns
MPO	0.99996	0.99993082, 0.99998548	0.004	0.999964	0.99993738, 0.9999883	0.005	0.999966	0.99993463, 0.99999538	0.028	0.999966	0.99993592, 0.99999277	0.018	0.999969	0.9999419, 0.99999462	0.021	0.999964	0.99993026, 0.999994	0.024
S1000A8	1.00001	0.99997924, 1.00005111	ns	0.999972	0.99993335, 1.00000734	ns	0.999967	0.99991821, 1.00001042	ns	1.00001	0.99997745, 1.00005375	ns	0.99997	0.9999310, 1.00000662	ns	0.999967	0.99991821, 1.00001042	ns
S100A9	1.00014	0.99997097, 1.0003574	ns	1.00006	0.99988823, 1.00026038	ns	0.999764	0.99912231, 1.00008787	ns	1.00013	0.99995116, 1.00035729	ns	1.00004	0.9998618, 1.00025272	ns	0.999761	0.99911568, 1.00008743	ns
IL8	1.00021	0.99900788, 1.00135183	ns	1.0005	0.99935805, 1.00184672	ns	1.00058	0.99899324, 1.00276854	ns	0.99999	0.99870015, 1.00120699	ns	1.00036	0.99914, 1.00175967	ns	1.00058	0.99899015, 1.00277696	ns
IL10	0.999593	0.99614533, 1.00328845	ns	1.00086	0.99664578, 1.00565744	ns	0.999329	0.99421427, 1.003436	ns	0.999372	0.99587192, 1.00328689	ns	1.00071	0.9964433, 1.00580801	ns	0.999327	0.99421454, 1.00343649	ns
IL12/23(p40)	0.999999	0.99997926, 1.00001958	ns	1.00001	0.99998218, 1.00004059	ns	1	0.99997197, 1.00002498	ns	1.00001	0.99998478, 1.00002895	ns	1.00002	0.9999937, 1.00005797	ns	1	0.99997045, 1.00002675	ns
GM-CSF	1.00023	0.99969287, 1.0012065	ns	1.00054	0.99971835, 1.00228606	ns	0.999979	0.99934947, 1.00051833	ns	1.00037	0.9997816, 1.00143756	ns	1.00079	0.9999304,1.00274033	ns	0.999979	0.99933904, 1.0005307	ns
TNF	1.00052	1.00003863, 1.00112193	ns	1.00051	1.00007857, 1.0010209	0.031	1.00059	1.00006205, 1.00125092	0.045	1.00061	1.00011605, 1.00122728	0.028	1.00063	1.0001616,1.00117841	0.014	1.00062	1.00008131, 1.00129347	0.038
IFNg	0.999934	0.99955873, 1.00031359	ns	0.999846	0.99942409, 1.00025093	ns	0.999518	0.99886572, 1.00009291	ns	0.999914	0.99951097, 1.00031177	ns	0.999786	0.999347, 1.00020586	ns	0.999518	0.99886584, 1.00009282	ns
*Adjusted for sex
NB: Each lung pathology factor was examined separately; no two factors were entered at once
ns = not significant; CI = Confidence interval; OR = odds ratio
